# Supplementary material for: Magnetic activated carbon particles as stimuli-responsive vehicles for methotrexate
Source: Royal Society of Chemistry journal article supplement (doi:10.1039/d4ma01037j), 2025-01-01
Supplement: d4ma01037j1.pdf [file d4ma01037j1.pdf]

## Supplementary Information:

### Magnetic activated carbon particles as stimuli-responsive vehicles for methotrexate

J.A. Lirio Piñar<sup>1,2</sup> †, M. Lázaro<sup>1,2,3</sup> †, G.R. Iglesias<sup>1,2,3,4</sup>, Tania Romacho<sup>5</sup>, A.V.  
Delgado<sup>1,2,3,4</sup>, Gracia García-García<sup>2,5</sup> \*, S. Ahualli<sup>1,4</sup> \*

#### 1. Size obtained by DLS

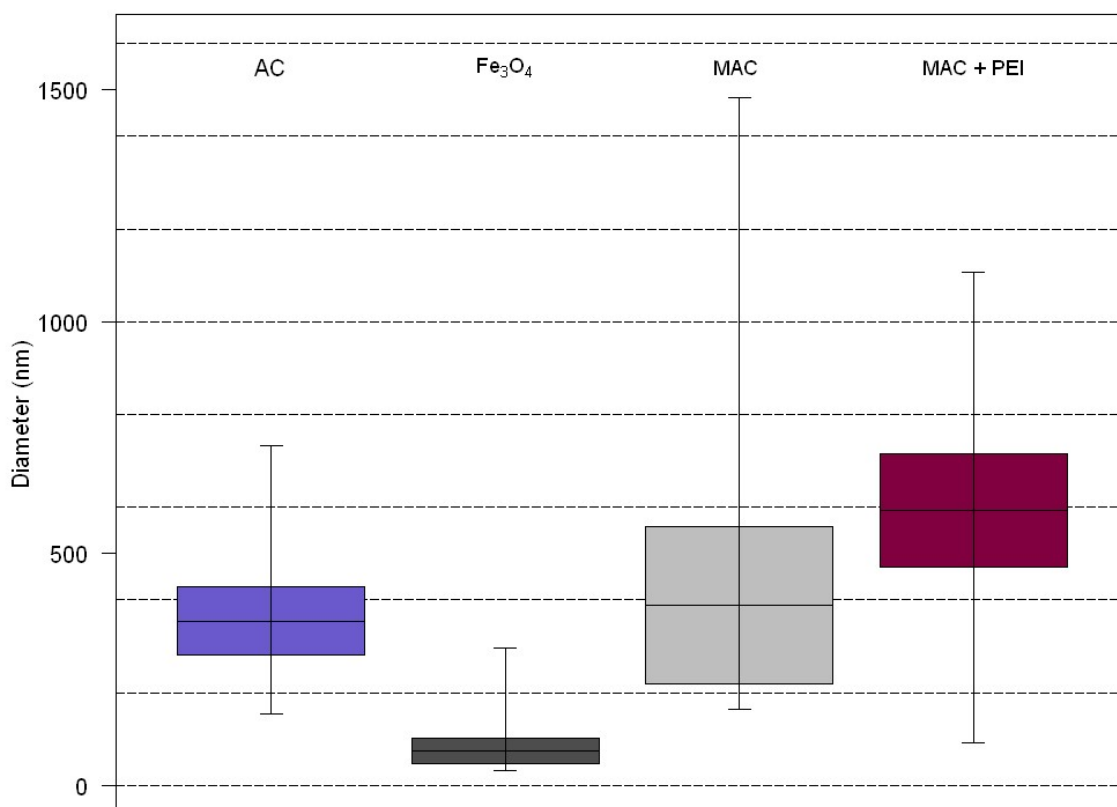

Fig. S1. Boxplot of size determinations using DLS technique of bare magnetite (MAG), activated carbon (AC), magnetic activated carbon naked (MAC) and polymer coated sample (PEI-MAC).

## 2. Photothermia characterization for drug release

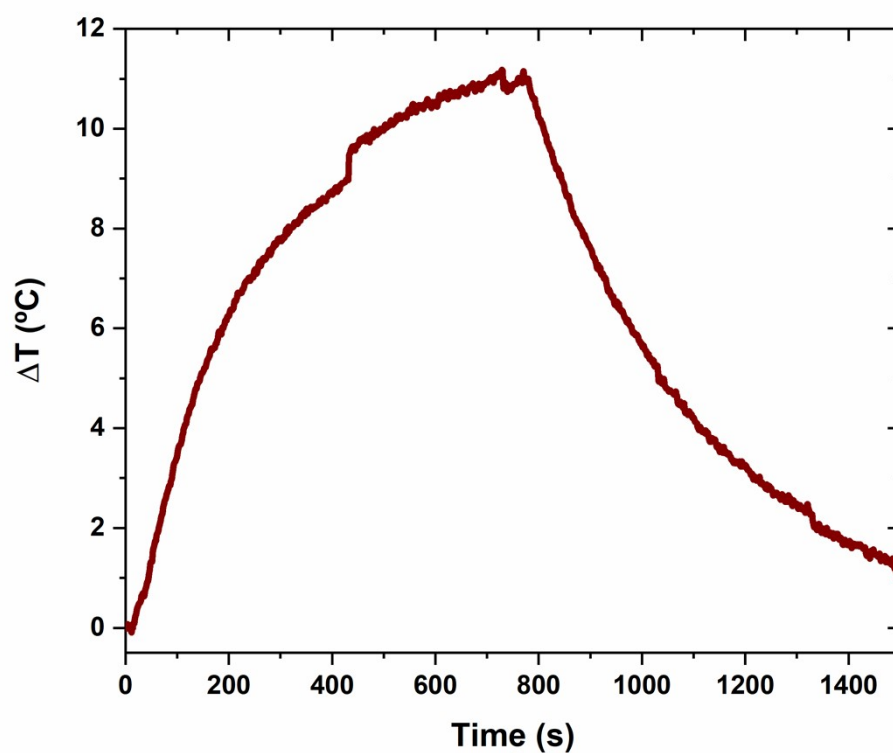

Fig. S2. Photothermia experiment performed by irradiating with 850 nm for 15 minutes at 1.5 W/cm<sup>2</sup> the MAC-PEI sample at 5 mg/mL (1.5 mL).

### 3. Calibration of MTX concentrations

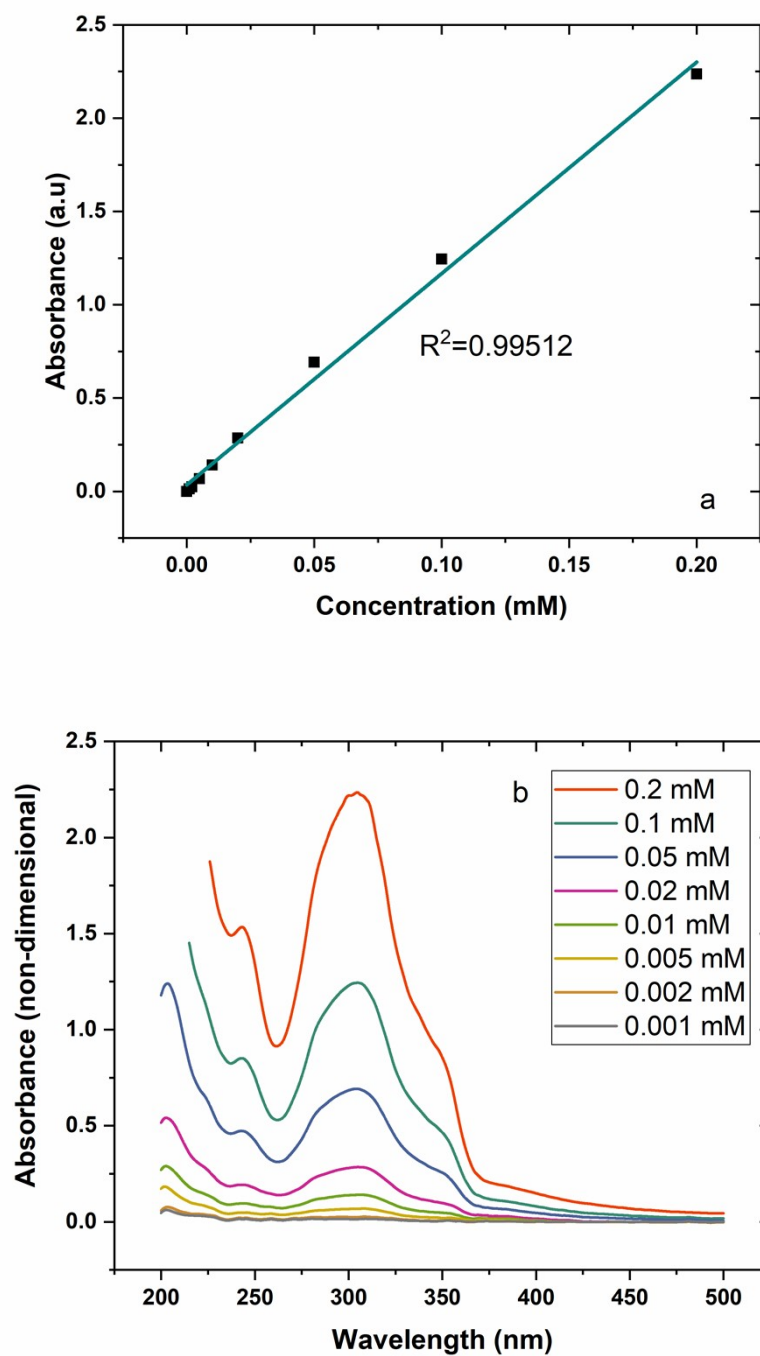

Fig. S3. Calibration of MTX concentrations performed at 305 nm (a) Calibration line (b) MTX adsorption peaks.

#### 4. Adsorption kinetics experiments

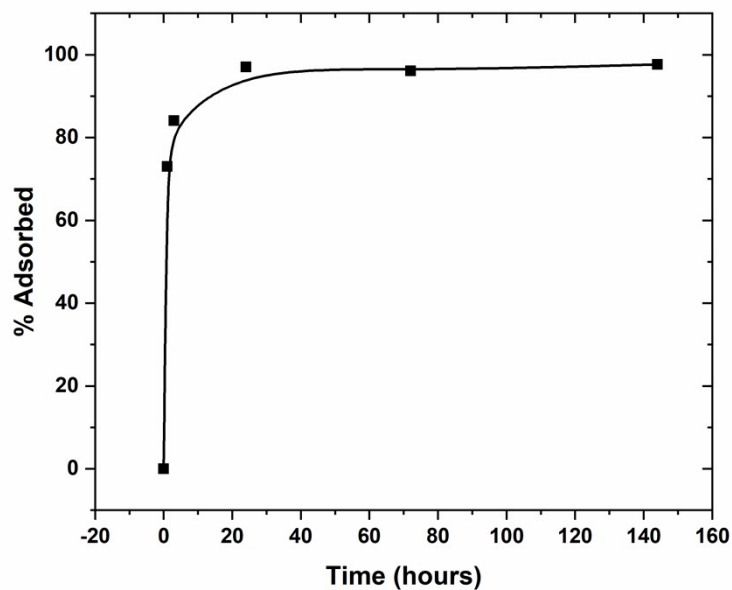

Fig. S4. Adsorption of MTX (0.6 mM, 1.5 mL) on the MAC-PEI (6 mg/mL) sample over time.

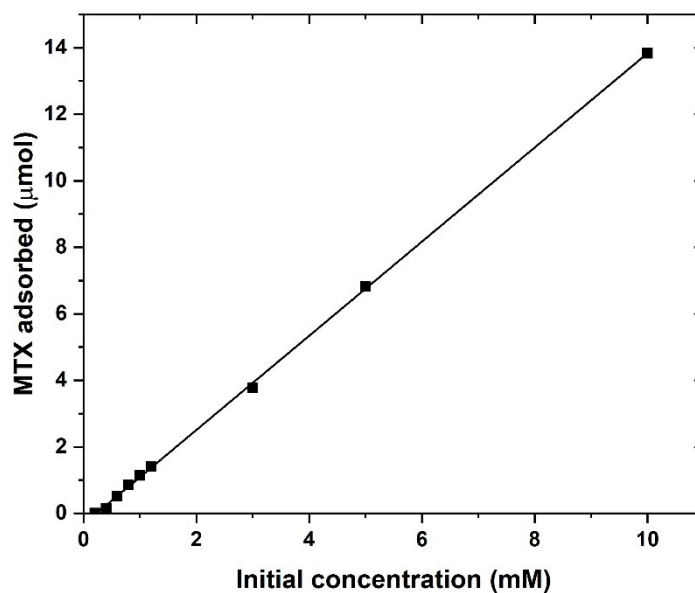

Fig. S5. Adsorption of MTX from solutions (1.5 mL) of the indicated concentrations after 24 h in contact with PEI-MAC particles (6 mg/mL). on the PEI coated MAC sample after 24 hours in contact.

## 5. MTX release at pH

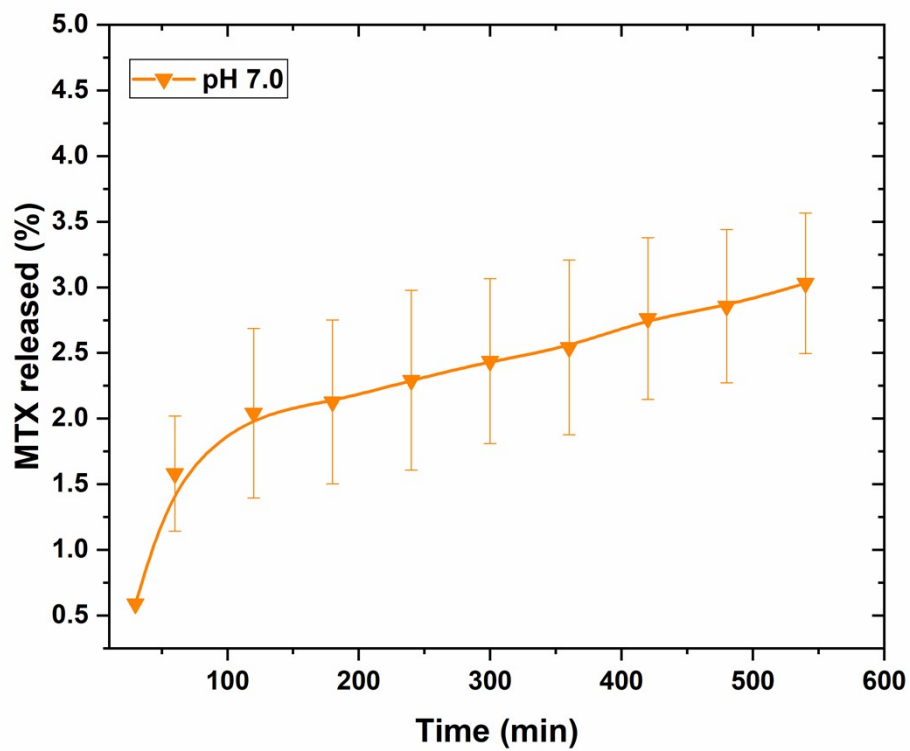

Fig. S6. MTX release without stimuli application in phosphate buffer at pH 7.4.
